# Supplementary material
Source: PubMed Central journal article supplement (PMC4042906)
Supplement: supp_kxr008_biosts-10175-File002.pdf [file supp_kxr008_biosts-10175-File002.pdf]

# Assessing the Dependence of Sensitivity and Specificity on Prevalence in Meta-analysis

Jialiang Li<sup>\*1</sup> and Jason P. Fine<sup>2</sup>

<sup>1</sup> Department of Statistics and Applied Probability, National University of Singapore

<sup>2</sup> Department of Biostatistics and Department of Statistics, University of North Carolina, Chapel Hill, USA

## Appendix

In the following proofs we consider four different cases:

Case I:  $p_i$  and  $S_i$  are known;

Case II:  $p_i$  are known,  $S_i$  are unknown and estimated by  $\hat{s}\mathbf{e}_i$ ;

Case III:  $S_i$  are known,  $p_i$  are unknown and estimated by  $\hat{p}_i$ ;

Case IV:  $p_i$  and  $S_i$  are unknown and estimated by  $\hat{p}_i$  and  $\hat{s}\mathbf{e}_i$ , respectively.

Case I is the most ideal state where complete knowledge about  $p_i$  and  $S_i$  are acquired in all studies. The examination of the relationship between these two quantities could be done in a standard analysis. Cases II and III allow one of the two quantities to be known exactly while the other has to be estimated. In a real meta analysis, Case IV may be the

---

\*Corresponding author: Department of Statistics and Applied Probability, National University of Singapore, Singapore 117546, email:stalj@nus.edu.sg.

most relevant to practice where both are estimated. We note that in the main manuscript we only present the theoretical results for Case IV. We introduce Case I - III to describe via comparison how the estimation of correlation between  $\mathbf{se}_i$  and  $p_i$  is gradually influenced by the fact that these population-specific parameters themselves are estimated from the data.

## 0.1 Consistency of $\hat{\rho}$

*Proof of Theorem 3.1.* It is easy to see that  $\hat{\rho}$  is consistent for Case I (Fisher (1925)). We only show the results for Case IV since other cases can be proved by following similar arguments. We note that

$$\begin{aligned} \sum_{i=1}^n w_i(\hat{\mathbf{se}}_i - \bar{\mathbf{se}})(\hat{p}_i - \bar{p}) &= \sum_{i=1}^n w_i(\hat{\mathbf{se}}_i - \mathbf{se})(\hat{p}_i - \mu_p) + (\mathbf{se} - \bar{\mathbf{se}})(n^{-1} \sum_{i=1}^n w_i \hat{p}_i - \bar{p}) \\ &\quad + (n^{-1} \sum_{i=1}^n w_i \hat{\mathbf{se}}_i - \bar{\mathbf{se}})(\mu_p - \bar{p}). \end{aligned}$$

Applying the strong law of large number (Theorem 1.14 in Shao (1999)) for independent random variables with finite expectations, we can argue that as  $n \rightarrow \infty$  the second and third terms in the above equation vanish to zero almost surely whereas the first term converges to

$$\begin{aligned} &n^{-1} \sum_{i=1}^n E[w_i(\hat{\mathbf{se}}_i - \mathbf{se})(\hat{p}_i - \mu_p)] \\ &= n^{-1} \sum_{i=1}^n E[w_i(\mathbf{S}_i - \mathbf{se})(\hat{p}_i - p_i)] + n^{-1} \sum_{i=1}^n E[w_i(\mathbf{S}_i - \mathbf{se})(p_i - \mu_p)]. \end{aligned}$$

with probability one. Followed by the consistency of  $\hat{p}_i$  and the use of a version of dominated convergence theorem (ex 6.3 in Durrett (2005)), it can be shown that

$$n^{-1} \sum_{i=1}^n E[w_i(\hat{\mathbf{se}}_i - \mathbf{se})(\hat{p}_i - \mu_p)] \rightarrow \mu_w E(\mathbf{S} - \mathbf{se})(p - \mu_p).$$

Similarly, we can show

$$\begin{aligned} n^{-1} \sum_{i=1}^n w_i (\hat{\mathbf{S}}\mathbf{e}_i - \bar{\mathbf{S}}\mathbf{e})^2 &\rightarrow_{a.s.} \mu_w E(\mathbf{S} - \mathbf{S}\mathbf{e})^2, \\ n^{-1} \sum_{i=1}^n w_i (\hat{p}_i - \bar{p})^2 &\rightarrow_{a.s.} \mu_w E(p - \mu_p)^2. \end{aligned}$$

Finally we use the continuous mapping theorem (Theorem 1.10 in Shao (1999)) to conclude

$$\hat{\rho} \rightarrow_{a.s.} \rho.$$

□

## 0.2 Consistency and normality of $\hat{\boldsymbol{\alpha}}$

*Proof of Theorem 4.1.* By using strong law of large number for independent variables, we have

$$n^{-1} \sum_{i=1}^n w_i \frac{(\hat{\mathbf{S}}\mathbf{e}_i - f(\hat{p}_i, \boldsymbol{\alpha}))\dot{f}_{\boldsymbol{\alpha}}}{f(\hat{p}_i, \boldsymbol{\alpha})(1 - f(\hat{p}_i, \boldsymbol{\alpha}))} \rightarrow_{a.s.} \mu_w n^{-1} \sum_{i=1}^n E \frac{(\hat{\mathbf{S}}\mathbf{e}_i - f(\hat{p}_i, \boldsymbol{\alpha}))\dot{f}_{\boldsymbol{\alpha}}}{f(\hat{p}_i, \boldsymbol{\alpha})(1 - f(\hat{p}_i, \boldsymbol{\alpha}))}. \quad (1)$$

By using dominated convergence theorem, the fact that  $\hat{\mathbf{S}}\mathbf{e}_i$  is uncorrelated to  $\hat{p}_i$  and the consistency of  $\hat{p}_i$  to  $p_i$ , we have

$$E \frac{(\hat{\mathbf{S}}\mathbf{e}_i - f(\hat{p}_i, \boldsymbol{\alpha}))\dot{f}_{\boldsymbol{\alpha}}}{f(\hat{p}_i, \boldsymbol{\alpha})(1 - f(\hat{p}_i, \boldsymbol{\alpha}))} \rightarrow E \frac{(\mathbf{S}_i - f(p_i, \boldsymbol{\alpha}))\dot{f}_{\boldsymbol{\alpha}}}{f(p_i, \boldsymbol{\alpha})(1 - f(p_i, \boldsymbol{\alpha}))}.$$

The limit on the right-hand-side is zero when evaluated at the true parameter. This verifies that the estimating equation defined in (4.2) is asymptotically unbiased and the consistency of  $\hat{\boldsymbol{\alpha}}$  follows (eg. Lemma 5.10 in van der Vaart (1998)).

□

*Proof of Theorem 4.2.* The asymptotic normality of  $\sqrt{n}(\hat{\boldsymbol{\alpha}} - \boldsymbol{\alpha})$  is now a consequence of Theorem 5.21 in van der Vaart (1998). We consider Case I first. Denote  $V_i(\boldsymbol{\alpha}) = w_i \frac{(\mathbf{S}_i - f(p_i, \boldsymbol{\alpha})) \dot{f}_{\boldsymbol{\alpha}}}{f(\hat{p}_i, \boldsymbol{\alpha})(1 - f(\hat{p}_i, \boldsymbol{\alpha}))}$ .

We then have

$$n^{-1/2} \sum_{i=1}^n V_i(\boldsymbol{\alpha}) \rightarrow_d N(0, \tilde{W}_2),$$

where

$$\tilde{W}_2 = \lim_{n \rightarrow \infty} n^{-1} E \left[ \sum_{i=1}^n w_i^2 \frac{\text{var}(\mathbf{S}_i | p_i) \dot{f}_{\boldsymbol{\alpha}} \dot{f}_{\boldsymbol{\alpha}}^T}{f(p_i, \boldsymbol{\alpha})^2 (1 - f(p_i, \boldsymbol{\alpha}))^2} \right]$$

The derivative of the estimating equation (4.2) with respect to  $\boldsymbol{\alpha}$  is given by

$$\begin{aligned} H_n(\boldsymbol{\alpha}) = & n^{-1} \sum_{i=1}^n w_i \left[ \frac{\mathbf{S}_i - f(p_i, \boldsymbol{\alpha})}{f(p_i, \boldsymbol{\alpha})(1 - f(p_i, \boldsymbol{\alpha}))} \ddot{f}_{\boldsymbol{\alpha}} + \frac{(\mathbf{S}_i - f(p_i, \boldsymbol{\alpha}))(2f(p_i, \boldsymbol{\alpha}) - 1) \dot{f}_{\boldsymbol{\alpha}}(p_i) \dot{f}_{\boldsymbol{\alpha}}(p_i)^T}{f(p_i, \boldsymbol{\alpha})^2 (1 - f(p_i, \boldsymbol{\alpha}))^2} \right. \\ & \left. + \frac{\dot{f}_{\boldsymbol{\alpha}}(p_i) \dot{f}_{\boldsymbol{\alpha}}(p_i)^T}{f(p_i, \boldsymbol{\alpha})(1 - f(p_i, \boldsymbol{\alpha}))} \right]. \end{aligned}$$

It follows that the summations of the first two terms converge to zero and the third term converges to

$$H = \lim_{n \rightarrow \infty} n^{-1} \sum_{i=1}^n w_i E \frac{\dot{f}_{\boldsymbol{\alpha}}(p_i) \dot{f}_{\boldsymbol{\alpha}}(p_i)^T}{f(p_i, \boldsymbol{\alpha})(1 - f(p_i, \boldsymbol{\alpha}))} = \mu_w E \frac{\dot{f}_{\boldsymbol{\alpha}}(p) \dot{f}_{\boldsymbol{\alpha}}(p)^T}{f(p, \boldsymbol{\alpha})(1 - f(p, \boldsymbol{\alpha}))}.$$

Therefore, under Case I, the sequence of  $\sqrt{n}(\hat{\boldsymbol{\alpha}} - \boldsymbol{\alpha})$  is asymptotically normal with mean zero and covariance matrix  $H^{-1} \tilde{W}_2 H^{-1}$ .

We then consider Case II. The estimating equations (4.2) can now be decomposed into

$$n^{-1} \sum_{i=1}^n U_i(\boldsymbol{\alpha}) + n^{-1} \sum_{i=1}^n V_i(\boldsymbol{\alpha}),$$

where  $U_i(\boldsymbol{\alpha}) = w_i \frac{(\mathbf{se}_i - \mathbf{S}_i) \dot{f}_{\boldsymbol{\alpha}}}{f(p_i, \boldsymbol{\alpha})(1 - f(p_i, \boldsymbol{\alpha}))}$ .

For the first term, we have

$$n^{-1/2} \sum_{i=1}^n U_i(\boldsymbol{\alpha}) \rightarrow_d N(0, \tilde{W}_1),$$

where

$$\begin{aligned} \tilde{W}_1 &= \lim_{n \rightarrow \infty} n^{-1} E \left[ \sum_{i=1}^n w_i^2 \frac{\text{var}(\hat{\mathbf{s}}\mathbf{e}_i | \mathbf{S}_i) \dot{f}_\alpha \dot{f}_\alpha^T}{f(p_i, \boldsymbol{\alpha})^2 (1 - f(p_i, \boldsymbol{\alpha}))^2} \right] \\ &= \lim_{n \rightarrow \infty} n^{-1} \sum_{i=1}^n E \left[ w_i^2 \frac{\mathbf{S}_i(1 - \mathbf{S}_i) \dot{f}_\alpha(p_i) \dot{f}_\alpha(p_i)^T}{N_i f(p_i, \boldsymbol{\alpha})^2 (1 - f(p_i, \boldsymbol{\alpha}))^2} \right], \end{aligned}$$

where the second equality follows from  $\text{var}(\hat{\mathbf{s}}\mathbf{e}_i | \mathbf{S}_i) = \mathbf{S}_i(1 - \mathbf{S}_i)/N_i$ .

The second term converges to the same normal distribution as argued previously. Furthermore, the two terms are orthogonal if we observe

$$\begin{aligned} E(U_i V_i^T) &= E\{E(U_i V_i^T | \mathbf{S}_i, p_i)\} \\ &= E\left\{ \frac{w_i^2 \dot{f}_\alpha \dot{f}_\alpha^T}{f(p_i, \boldsymbol{\alpha})^2 (1 - f(p_i, \boldsymbol{\alpha}))^2} E((\hat{\mathbf{s}}\mathbf{e}_i - \mathbf{S}_i)(\mathbf{S}_i - f(p_i, \boldsymbol{\alpha})) | \mathbf{S}_i, p_i) \right\} \\ &= E\left\{ \frac{w_i^2 \dot{f}_\alpha \dot{f}_\alpha^T}{f(p_i, \boldsymbol{\alpha})^2 (1 - f(p_i, \boldsymbol{\alpha}))^2} (E(\hat{\mathbf{s}}\mathbf{e}_i | \mathbf{S}_i) - \mathbf{S}_i)(\mathbf{S}_i - f(p_i, \boldsymbol{\alpha})) \right\} = 0. \end{aligned}$$

The derivative of the estimating equation (4.2) with respect to  $\boldsymbol{\alpha}$  in this case is given by

$$\begin{aligned} H_n^*(\boldsymbol{\alpha}) &= n^{-1} \sum_{i=1}^n w_i \left[ \frac{\hat{\mathbf{s}}\mathbf{e}_i - f(p_i, \boldsymbol{\alpha})}{f(p_i, \boldsymbol{\alpha})(1 - f(p_i, \boldsymbol{\alpha}))} \ddot{f}_\alpha(p_i) + \frac{(\hat{\mathbf{s}}\mathbf{e}_i - f(p_i, \boldsymbol{\alpha}))(2f(p_i, \boldsymbol{\alpha}) - 1) \dot{f}_\alpha(p_i) \dot{f}_\alpha(p_i)^T}{f(p_i, \boldsymbol{\alpha})^2 (1 - f(p_i, \boldsymbol{\alpha}))^2} \right. \\ &\quad \left. + \frac{\dot{f}_\alpha(p_i) \dot{f}_\alpha(p_i)^T}{f(p_i, \boldsymbol{\alpha})(1 - f(p_i, \boldsymbol{\alpha}))} \right], \end{aligned}$$

which converges to  $H$  in probability again. Therefore  $\sqrt{n}(\hat{\boldsymbol{\alpha}} - \boldsymbol{\alpha})$  is asymptotically normal with mean zero and covariance matrix  $H^{-1}(\tilde{W}_1 + \tilde{W}_2)H^{-1}$ .

We skip Case III since its proof can be mimicked partially from what we show in the

following case. In Case IV where  $p_i$  is also replaced by  $\hat{p}_i$  in estimating equations (4.2), the equations can be written as

$$n^{-1} \sum_{i=1}^n U_i^*(\boldsymbol{\alpha}) + n^{-1} \sum_{i=1}^n V_i^*(\boldsymbol{\alpha}) + n^{-1} \sum_{i=1}^n W_i^*(\boldsymbol{\alpha}),$$

where we denote  $U_i^*(\boldsymbol{\alpha}) = w_i \frac{(\hat{\mathbf{s}}\mathbf{e}_i - \mathbf{s}_i) \dot{f}_{\boldsymbol{\alpha}}(\hat{p}_i)}{f(\hat{p}_i, \boldsymbol{\alpha})(1-f(\hat{p}_i, \boldsymbol{\alpha}))}$ ,  $V_i^*(\boldsymbol{\alpha}) = w_i \frac{(\mathbf{s}_i - f(p_i, \boldsymbol{\alpha})) \dot{f}_{\boldsymbol{\alpha}}(\hat{p}_i)}{f(\hat{p}_i, \boldsymbol{\alpha})(1-f(\hat{p}_i, \boldsymbol{\alpha}))}$ , and  $W_i^*(\boldsymbol{\alpha}) = w_i \frac{(f(p_i, \boldsymbol{\alpha}) - f(\hat{p}_i, \boldsymbol{\alpha})) \dot{f}_{\boldsymbol{\alpha}}(\hat{p}_i)}{f(\hat{p}_i, \boldsymbol{\alpha})(1-f(\hat{p}_i, \boldsymbol{\alpha}))}$ . The three pieces are asymptotically equivalent to  $U_i(\boldsymbol{\alpha})$ ,  $V_i(\boldsymbol{\alpha})$ , and  $W_i(\boldsymbol{\alpha}) = w_i \frac{(f(p_i, \boldsymbol{\alpha}) - f(\hat{p}_i, \boldsymbol{\alpha})) \dot{f}_{\boldsymbol{\alpha}}(p_i)}{f(p_i, \boldsymbol{\alpha})(1-f(p_i, \boldsymbol{\alpha}))}$ , respectively.

The first two terms thus converges to two normal distributions as argued before. For the last term, we have

$$\begin{aligned} \text{var}(n^{-1/2} \sum_{i=1}^n W_i(\boldsymbol{\alpha})) &= n^{-1} E \left[ \sum_{i=1}^n w_i^2 \frac{\text{var}(f(\hat{p}_i, \boldsymbol{\alpha}) | p_i) \dot{f}_{\boldsymbol{\alpha}} \dot{f}_{\boldsymbol{\alpha}}^T}{f(p_i, \boldsymbol{\alpha})^2 (1-f(p_i, \boldsymbol{\alpha}))^2} \right] \\ &= n^{-1} \sum_{i=1}^n w_i^2 E \frac{f'(p_i, \boldsymbol{\alpha})^2 \lambda_i \dot{f}_{\boldsymbol{\alpha}}(p_i) \dot{f}_{\boldsymbol{\alpha}}(p_i)^T}{M_i f(p_i, \boldsymbol{\alpha})^2 (1-f(p_i, \boldsymbol{\alpha}))^2} \\ &\rightarrow n^{-1} \sum_{i=1}^n \lambda_i \frac{w_i^2}{M_i} E \frac{f'(p, \boldsymbol{\alpha})^2 \dot{f}_{\boldsymbol{\alpha}}(p) \dot{f}_{\boldsymbol{\alpha}}(p)^T}{f(p, \boldsymbol{\alpha})^2 (1-f(p, \boldsymbol{\alpha}))^2} \quad \text{as } n \rightarrow \infty, \\ &\rightarrow 0 \quad \text{as } M_i \rightarrow \infty, \end{aligned}$$

where the second equality follows a Taylor expansion and  $f'(x_0, \boldsymbol{\alpha})$  is the derivative of  $f(x, \boldsymbol{\alpha})$  with respect to  $x$  evaluated at  $x_0$ . Hence the last term converges to zero in probability.

The derivative of the estimating equation (4.2) with respect to  $\boldsymbol{\alpha}$  in this case is given by

$$\begin{aligned} H_n^{**}(\boldsymbol{\alpha}) &= n^{-1} \sum_{i=1}^n w_i \left[ \frac{\hat{\mathbf{s}}\mathbf{e}_i - f(\hat{p}_i, \boldsymbol{\alpha})}{f(\hat{p}_i, \boldsymbol{\alpha})(1-f(\hat{p}_i, \boldsymbol{\alpha}))} \ddot{f}_{\boldsymbol{\alpha}}(\hat{p}_i) + \frac{(\hat{\mathbf{s}}\mathbf{e}_i - f(\hat{p}_i, \boldsymbol{\alpha}))(2f(\hat{p}_i, \boldsymbol{\alpha}) - 1) \dot{f}_{\boldsymbol{\alpha}}(\hat{p}_i) \dot{f}_{\boldsymbol{\alpha}}(\hat{p}_i)^T}{f(\hat{p}_i, \boldsymbol{\alpha})^2 (1-f(\hat{p}_i, \boldsymbol{\alpha}))^2} \right. \\ &\quad \left. + \frac{\dot{f}_{\boldsymbol{\alpha}}(\hat{p}_i) \dot{f}_{\boldsymbol{\alpha}}(\hat{p}_i)^T}{f(\hat{p}_i, \boldsymbol{\alpha})(1-f(\hat{p}_i, \boldsymbol{\alpha}))} \right]. \end{aligned}$$

It follows that the first two terms converge to zero and the third term converges to

$$n^{-1} \sum_{i=1}^n E \left[ w_i \frac{\dot{f}_{\boldsymbol{\alpha}}(\hat{p}_i) \dot{f}_{\boldsymbol{\alpha}}(\hat{p}_i)^T}{f(\hat{p}_i, \boldsymbol{\alpha})(1 - f(\hat{p}_i, \boldsymbol{\alpha}))} \right].$$

By using similar arguments as the proof of Theorem 4.1, we can show that  $H_n^{**}(\boldsymbol{\alpha})$  converges in probability to  $H$ .

Combining all of the above results and using Slutsky's theorem, we conclude that under Case III the sequence of  $\sqrt{n}(\hat{\boldsymbol{\alpha}} - \boldsymbol{\alpha})$  is asymptotically normal with mean zero and covariance matrix  $H^{-1}(\tilde{W}_1 + \tilde{W}_2)H^{-1}$ .

□

## References

- [1] Fisher, R.A. (1925). *Statistical Methods for Research Workers*. Edinburgh and London: Oliver and Boyd.
- [2] Durrett, R. (2005). *Probability: Theory and Examples*. Third Edition. Duxbury.
- [3] Shao, J. (1999). *Mathematical Statistics*. Springer.
- [4] van der Vaart, A.W. (1998). *Asymptotic Statistics*. Cambridge University Press.

Table 1: Data for Example 1

| Study | Prevalence (%) | Sensitivity (%) | Specificity (%) |
|-------|----------------|-----------------|-----------------|
| 1     | 45.0           | 78.2            | 73.3            |
| 2     | 60.0           | 62.5            | 83.3            |
| 3     | 58.0           | 48.9            | 76.9            |
| 4     | 52.2           | 72.7            | 77.1            |
| 5     | 47.8           | 68.6            | 34.4            |
| 6     | 53.6           | 80.0            | 84.6            |
| 7     | 70.3           | 45.5            | 51.9            |
| 8     | 55.0           | 72.2            | 72.7            |
| 9     | 51.8           | 66.7            | 44.8            |
| 10    | 57.1           | 63.2            | 61.6            |
| 11    | 47.0           | 65.5            | 59.7            |
| 12    | 58.2           | 64.1            | 46.4            |
| 13    | 79.5           | 64.2            | 45.1            |
| 14    | 41.5           | 89.6            | 78.5            |
| 15    | 59.7           | 69.4            | 33.7            |

Table 2: Data for Example 2

| Study | Prevalence (%) | Sensitivity (%) | Specificity (%) |
|-------|----------------|-----------------|-----------------|
| 1     | 22             | 55              | 75              |
| 2     | 28             | 100             | 85              |
| 3     | 73             | 94              | 100             |
| 4     | 38             | 93              | 77              |
| 5     | 34             | 93              | 73              |
| 6     | 53             | 100             | 95              |
| 7     | 32             | 70              | 75              |
| 8     | 35             | 83              | 87              |
| 9     | 57             | 100             | 89              |
| 10    | 57             | 86              | 100             |
| 11    | 33             | 88              | 89              |
